# Supplementary material for: Magnetic Fe-doped ZnO nanocomposites: concentration-driven tuning of biocompatibility and antimicrobial potency
Source: Royal Society of Chemistry journal article supplement (doi:10.1039/d5en00670h), 2026-01-01
Supplement: d5en00670h1.pdf [file d5en00670h1.pdf]

## Supplementary Material

### **Magnetic Fe-Doped ZnO Nanocomposites: Concentration-Driven Tuning of Biocompatibility and Antimicrobial Potency**

Jerusa M. de Oliveira<sup>1,2†</sup>, Luciana R. de S. Floresta<sup>1,2†</sup>, Davi P. da Silva<sup>1,3,4†</sup>, Rener M. F. Duarte<sup>1,3†</sup>, Amanda I. dos S. Barbosa<sup>1</sup>, Adenilson F. dos Santos<sup>1</sup>, Edigar H. V. Dias<sup>5</sup>, Gabriel T. T. Garibaldi<sup>1,2</sup>, Dhandara E. de L. Sampaio<sup>2</sup>, Marylu M. de Lima<sup>7</sup>, André L. Saraiva<sup>6</sup>, Vinícius P. Bittar<sup>6</sup>, Foued S. Espindola<sup>4</sup>, Felipe B. Valer<sup>7</sup>, Valter Alvino<sup>4</sup>, Thiago L. Rocha<sup>8</sup>, Lucas Anhezini<sup>2†</sup>, Anielle Christine A. Silva<sup>1,3\*</sup>

<sup>1</sup> Strategic Materials Laboratory, Physics Institute, Federal University of Alagoas, Maceió, Alagoas, Brazil.

<sup>2</sup> Laboratory of *in vivo* Toxicity Analysis, Institute of Biological Sciences and Health, Federal Federal University of Alagoas, Maceió, Alagoas, Brazil.

<sup>3</sup> Rede Nordeste de Biotecnologia (RENORBIO), Chemistry Institute, Federal University of Alagoas, Maceió, Alagoas, Brazil.

<sup>4</sup> Laboratory of Wound Treatment Research, Institute of Pharmaceutical Sciences and Nursing School, Federal University of Alagoas, Maceió, Alagoas, Brazil.

<sup>5</sup> Department of Medicine, Biotechnology Institute, Federal University of Catalão, Catalão, Goiás, Brazil.

<sup>6</sup> Biochemistry and Molecular Biology Laboratory, Institute of Biotechnology, Federal University of Uberlândia, Uberlândia, Brazil.

<sup>7</sup> Department of BioMolecular Sciences, School of Pharmaceutical Sciences of Ribeirão Preto, University of São Paulo, Ribeirão Preto, São Paulo, Brazil.

<sup>8</sup> Laboratory of Environmental Biotechnology and Ecotoxicology, Institute of Tropical Pathology and Public Health, Federal University of Goiás, Goiânia, Goiás, Brazil.

† These authors contributed equally to this work.

\* Corresponding author details

Anielle Christine Almeida Silva

e-mail: [aniellechristineas@gmail.com](mailto:aniellechristineas@gmail.com)

Instituto de Física

Universidade Federal de Alagoas

Av. Lourival Melo Mota, S/N, Tabuleiro do Martins,

Maceió - AL, Cep: 57072-970

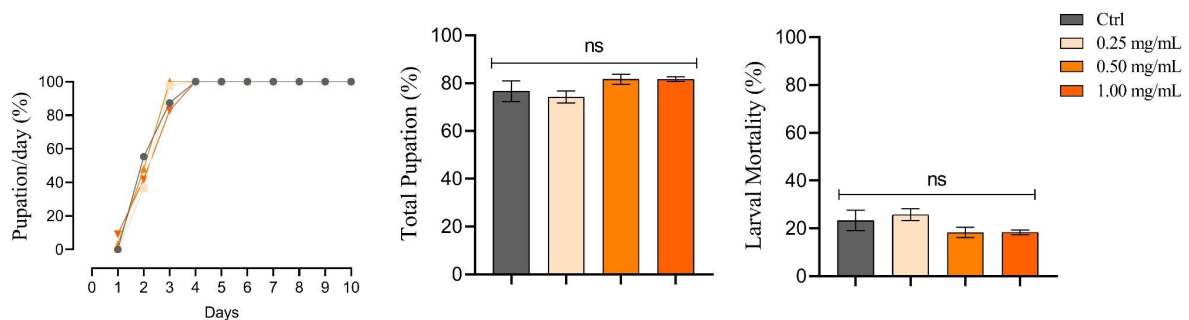

**Supplementary 1.** Iron oxide (Fe<sub>2</sub>O<sub>3</sub>) did not influence the oral exposure to nanocrystals during the post-embryonic development of fruit flies (*Drosophila melanogaster*). (A) Daily pupation formation. (B) Total pupation rate. (C) Larval motility.

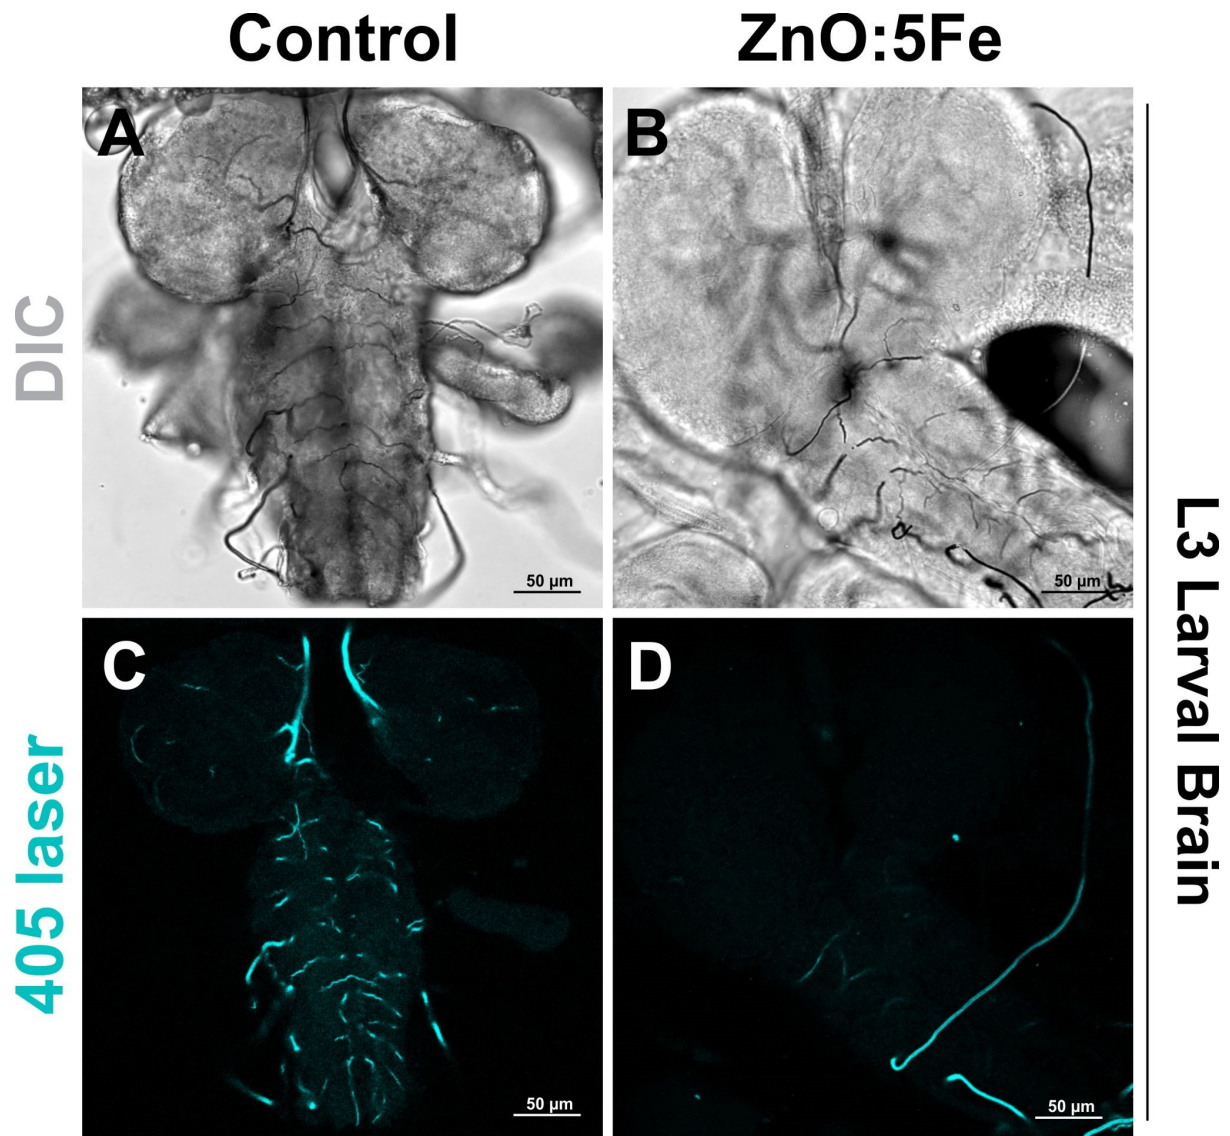

**Supplementary 2. Confocal images of *Canton S* third instar larval brains exposed to standard and supplemented media with ZnO:5Fe. Any signal of luminescence was detected both in control L3 larval brains exposed to standard media (A and C) as larvae fed in media supplemented with ZnO:5Fe NCs under 405 nm laser excitation (B and D).**
